# Supplementary material for: Femtosecond dynamics of stepwise two-photon ionization in solutions as revealed by pump–repump–probe detection with a burst mode of photoexcitation
Source: Royal Society of Chemistry journal article supplement (doi:10.1039/d1cp03866d), 2022-01-01
Supplement: d1cp03866d1.pdf [file d1cp03866d1.pdf]

Supporting Information for

# Femtosecond Dynamics of Stepwise Two-Photon Ionization in Solutions as Revealed by Pump-Repump-Probe Detection with Burst Mode of Photoexcitation

*Hikaru Sotome,\*<sup>1</sup> Masafumi Koga,<sup>1</sup> Tomoya Sawada,<sup>1</sup> Hiroshi Miyasaka\*<sup>1</sup>*

<sup>1</sup>Division of Frontier Materials Science and Center for Advanced Interdisciplinary Research, Graduate School of Engineering Science, Osaka University, Toyonaka, Osaka 560-8531, Japan,

## **CONTENT**

**S1. Scheme of pulse splitting with birefringent crystals**

### S1. Scheme of pulse splitting with birefringent crystals

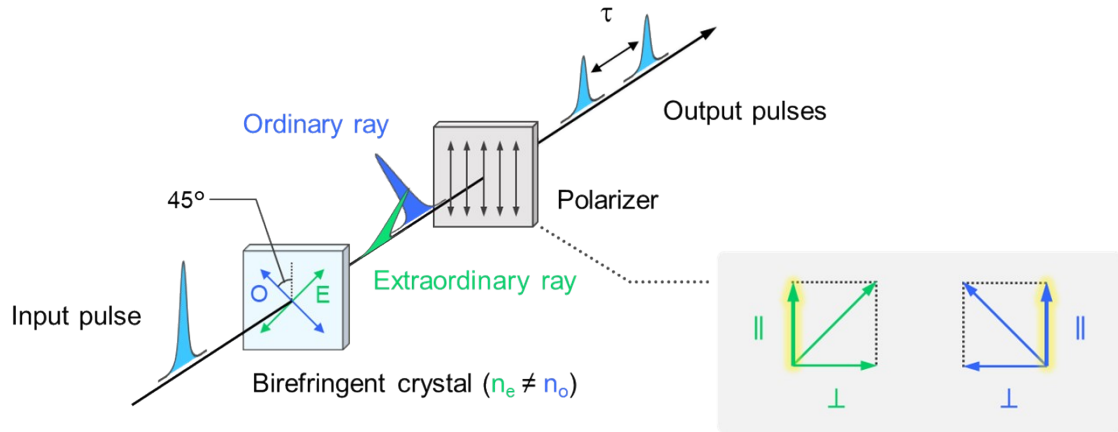

**Figure S1.** Schematic illustration of pulse splitting with a birefringent crystal. The input pulse whose polarization is tilted by 45 degree with respect to the ordinary and extraordinary axes of the crystal. Due to the distinct refractive indices, the input pulse is split into the ordinary and extraordinary rays. The polarizer extracts the electric component parallel to its orientation, and as a result, two output pulses are finally generated with a delay time ( $\tau$ ).

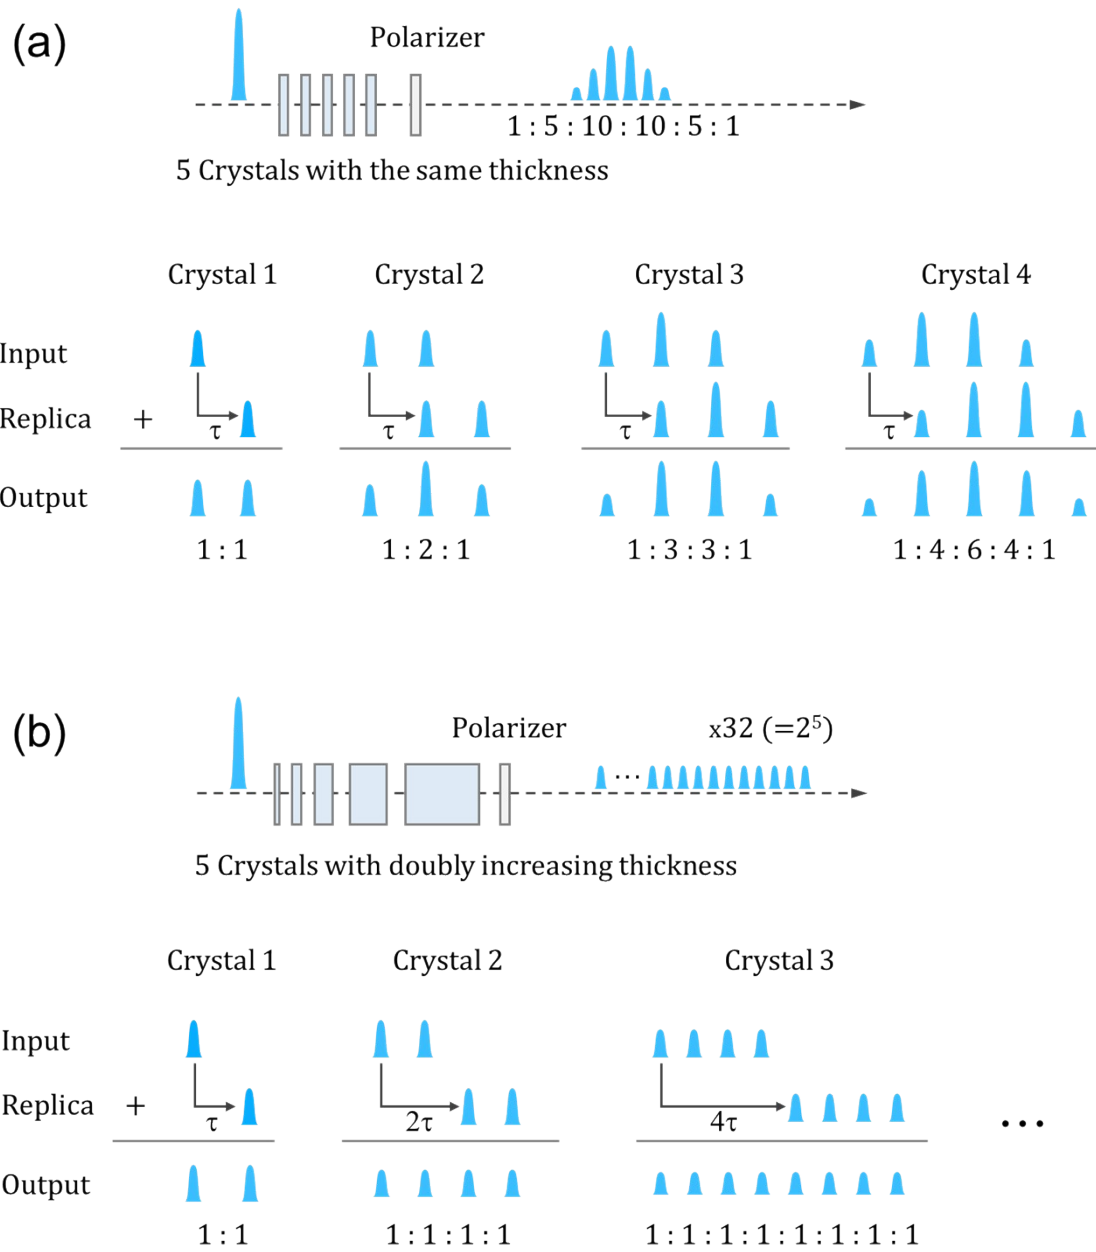

**Figure S2.** Schematic illustration of pulse splitting with 5 birefringent crystals with (a) the same thickness and (b) doubly increasing thickness.
